# Supplementary material for: A nano-composite of magnetite and hot-water-soluble starch: a cooperation resulting in an amplified catalytic activity on water
Source: Royal Society of Chemistry journal article supplement (doi:10.1039/c8nj00718g), 2018-01-01

## Supplementary Information

### Nano-Composite of Magnetite and Hot-Water-Soluble Starch: A Cooperation Resulting in an Amplified Catalytic Activity on Water

Sanaz Razikazemi, Kurosh Rad-Moghadam,\* and Saeedeh Toorchi Roudsari

Chemistry department, University of Guilan, Rasht 41335-19141; [radmm@guilan.ac.ir](mailto:radmm@guilan.ac.ir)

**S<sub>1</sub>** Determining the optimized amount of the catalyst, solvent, and temperature for the trial synthesis of 3,3'-(4-chlorophenyl)methylene-bis-(4-hydroxycoumarin-3-yl) **4d** and 3,4,6,7-tetrahydro-3,3,6,6-tetramethyl-9-(4-chlorophenyl)-2*H*-xanthene-1,8(5*H*,9*H*)-dione **5b**

| Entry | Catalyst <sup>a</sup><br>Charged    | Solvent      | Temp (°C)                          | Product <b>4d</b> |                        | Product <b>5b</b> |                        |           |
|-------|-------------------------------------|--------------|------------------------------------|-------------------|------------------------|-------------------|------------------------|-----------|
|       |                                     |              |                                    | Time              | Yield (%) <sup>a</sup> | Time              | Yield (%) <sup>a</sup> |           |
| 1     | --                                  | --           | H <sub>2</sub> O                   | 90                | 35 min                 | 23                | 30 min                 | 9         |
| *     | --                                  | --           | EtOH 95%                           | reflux            | 5 h                    | 53                | 6 h                    | 35        |
| *     | HWSS@Fe <sub>3</sub> O <sub>4</sub> | 15 mg        | n-Hexane                           | reflux            | 4 h                    | 19                | 6 h                    | trace     |
| *     | HWSS@Fe <sub>3</sub> O <sub>4</sub> | 15 mg        | CH <sub>2</sub> Cl <sub>2</sub>    | reflux            | 4 h                    | 27                | 6 h                    | 12        |
| *     | HWSS@Fe <sub>3</sub> O <sub>4</sub> | 15 mg        | MeCN                               | reflux            | 4 h                    | 49                | 1 h                    | 31        |
| *     | HWSS@Fe <sub>3</sub> O <sub>4</sub> | 15 mg        | EtOH 95%                           | reflux            | 45 min                 | 79                | 45 min                 | 72        |
| 2     | HWSS@Fe <sub>3</sub> O <sub>4</sub> | 15 mg        | H <sub>2</sub> O                   | 80                | 35 min                 | 84                | 30 min                 | 82        |
| 3     | HWSS@Fe <sub>3</sub> O <sub>4</sub> | <b>15 mg</b> | <b>H<sub>2</sub>O</b>              | <b>90</b>         | <b>35 min</b>          | <b>90</b>         | <b>30 min</b>          | <b>87</b> |
| 4     | HWSS@Fe <sub>3</sub> O <sub>4</sub> | 15 mg        | H <sub>2</sub> O                   | 90                | 45 min                 | 90                | 40 min                 | 87        |
| 5     | HWSS@Fe <sub>3</sub> O <sub>4</sub> | 15 mg        | H <sub>2</sub> O                   | 100               | 35 min                 | 88                | 30 min                 | 86        |
| 6     | HWSS@Fe <sub>3</sub> O <sub>4</sub> | 15 mg        | H <sub>2</sub> O/EtOH <sup>b</sup> | 90                | 35 min                 | 82                | 30 min                 | 71        |
| 7     | HWSS@Fe <sub>3</sub> O <sub>4</sub> | 15 mg        | H <sub>2</sub> O                   | r.t.              | 35 min                 | trace             | 30 min                 | --        |
| 8     | HWSS@Fe <sub>3</sub> O <sub>4</sub> | 15 mg        | --                                 | 90                | 35 min                 | trace             | 30 min                 | --        |
| 9     | HWSS@Fe <sub>3</sub> O <sub>4</sub> | 20 mg        | H <sub>2</sub> O                   | 90                | 35 min                 | 90                | 30 min                 | 87        |
| 10    | HWSS@Fe <sub>3</sub> O <sub>4</sub> | 10 mg        | H <sub>2</sub> O                   | 90                | 35 min                 | 81                | 30 min                 | 63        |
| 11    | HWSS@Fe <sub>3</sub> O <sub>4</sub> | 5 mg         | H <sub>2</sub> O                   | 90                | 35 min                 | 64                | 30 min                 | 28        |
| 12    | HWSS                                | 15 mg        | H <sub>2</sub> O                   | 90                | 35 min                 | 53                | 30 min                 | 56        |
| 13    | Fe <sub>3</sub> O <sub>4</sub>      | 15 mg        | H <sub>2</sub> O                   | 90                | 35 min                 | 41                | 30 min                 | 36        |

Reaction conditions: 4-hydroxycoumarin (2 mmol) and 4-chlorobenzaldehyde (1 mmol) in distilled water (2 mL). Dimedone (2 mmol) and 4-chlorobenzaldehyde (1 mmol) in distilled water (2 mL). <sup>a</sup>Yields of the isolated products. <sup>b</sup>Aqueous ethanol 50%, otherwise stated.

S<sub>2</sub> The original TEM images of HWSS@Fe<sub>3</sub>O<sub>4</sub>

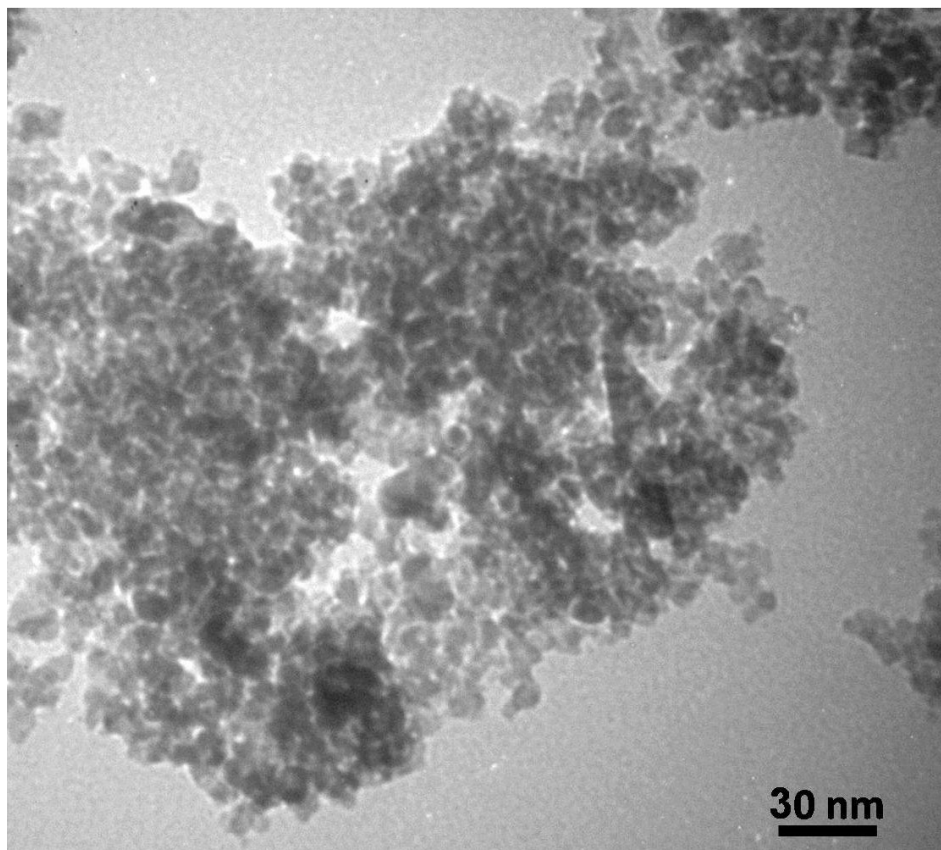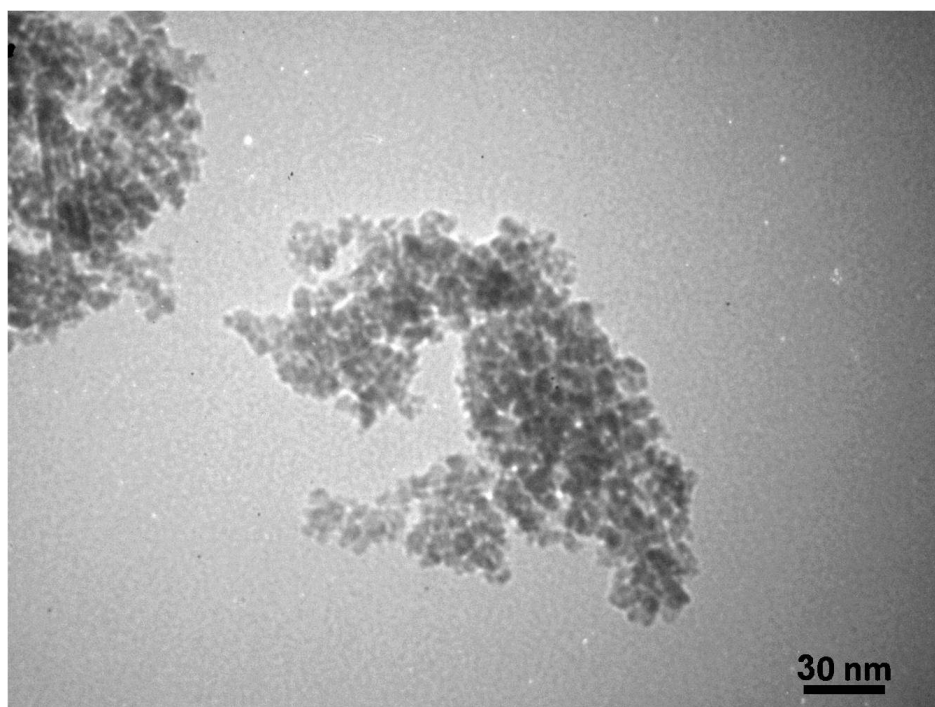

S<sub>3</sub> The yields of the model products **4d** and **5b** versus the mass of the catalyst

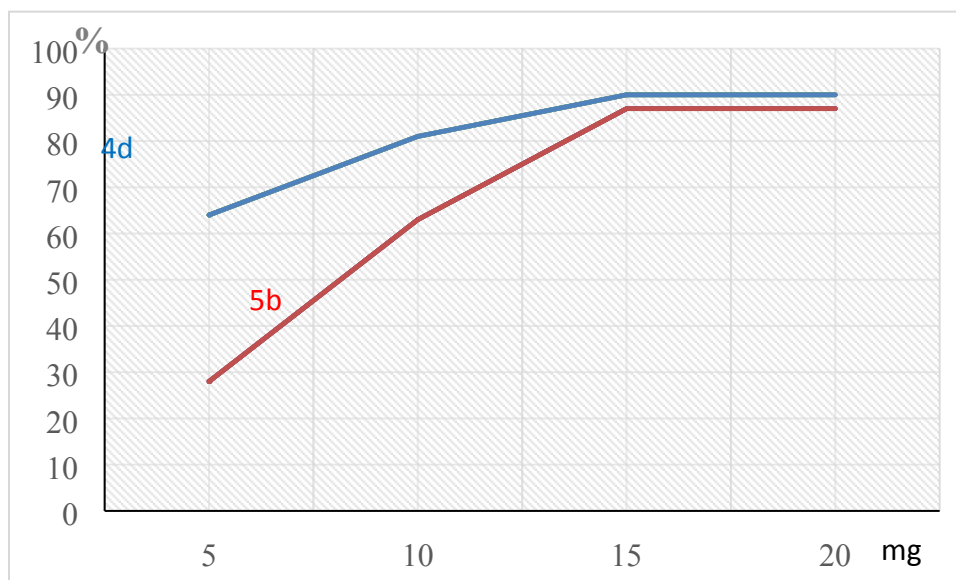

S<sub>4</sub> Magnetic separation of the nano-composite

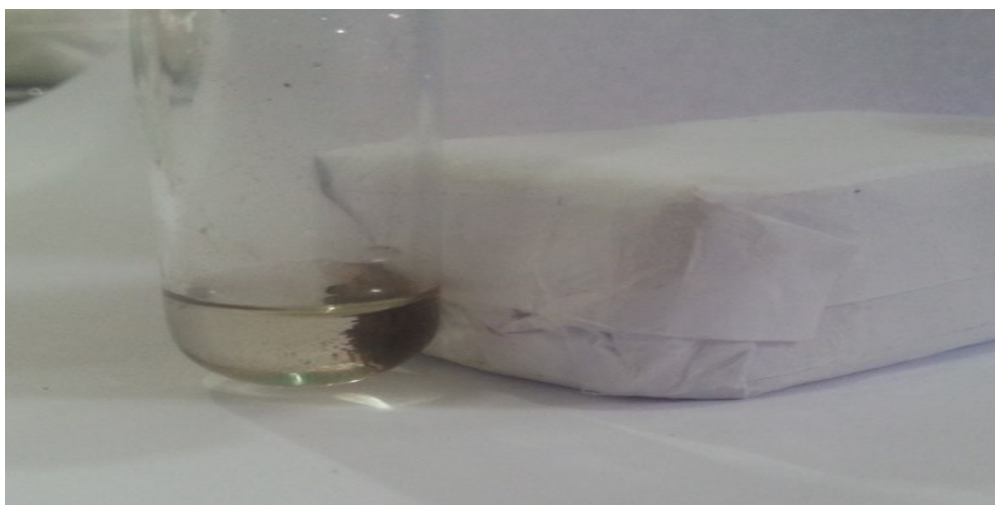

Supplement: c8nj00718g1.pdf [file c8nj00718g1.pdf]
